# Supplementary material
Source: MDPI journal article supplement (https://www.mdpi.com/2072-4292/14/18/4626)
Supplement: s1 [file s1]

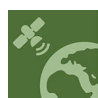

Supplement Table S1

| Abbreviation | Name of National Nature Reserves                          | Abbreviation | Name of National Nature Reserves    |
|--------------|-----------------------------------------------------------|--------------|-------------------------------------|
| ARJS         | Aerjin Mountain                                           | LWQ-RD       | Leiwuqi Red Deer                    |
| AZH          | Anzihe                                                    | LX-HK        | Longxi-Hongkou                      |
| BMS          | Baima Snow                                                | MK           | Mangkang                            |
| BNC          | Black-necked Crane in Middle Yarlung Tsangpo River Valley | QDMHAF       | Qaidam Haloxylon Ammodendron Forest |
| BSH          | Baishuihe                                                 | QHL          | Qinghai Lake                        |
| BSJ          | Baishuijiang                                              | QLM          | Qilian Mountain                     |
| CQSD         | Chaqingsongduo White-Lipped Deer                          | QMLM         | Qomolangma                          |
| CSGM         | Changsha Gongma                                           | RRGW         | Ruoergai Wetland                    |
| CT           | Chang Tang                                                | SLK          | Selinko                             |
| CYCBG        | Chayu Cibagou                                             | SQ-YR        | Shouqu of the Yellow River          |
| FGW          | Four Girls Mountain                                       | TH           | Taohe                               |
| GGM          | Gongga Mountain                                           | TJH          | Tangjiahe                           |
| GH-ZC        | Gahai-Zecha                                               | TRHR         | Three-River Headwater Region        |
| GLM          | Gaoligongshan                                             | WAL          | Wanglang                            |
| GXG          | Gexigou                                                   | WOL          | Wolong                              |
| HX           | Hoh Xil                                                   | XBD          | Xuebaoding                          |
| HZS          | Haizishan                                                 | XHMD         | Xunhuamengda                        |
| JZG          | Jiuzhaigou                                                | XZZG         | Xiaozhaizigou                       |
| LB           | Longbao                                                   | YCW          | Yanchiwan                           |
| LHS          | Lianhuashan                                               | YD           | Yading                              |
| LLW          | Lhalu Wetland                                             | YLTGC        | Yarlung Tsangpo Grand Canyon        |
